# Supplementary material
Source: PubMed Central journal article supplement (PMC2567500)
Supplement: 0802127105_0802127105SI.pdf [file 0802127105_0802127105SI.pdf]

# Supporting Information

Dreher *et al.* 10.1073/pnas.0802127105

Table S1. Foci of activations during anticipation of rewards in young and older subjects and comparison between the two groups

| Anatomical structure       | Younger subjects                |         | Older subjects                  |              | Younger > Older                 |         | Older > Younger                 |         |
|----------------------------|---------------------------------|---------|---------------------------------|--------------|---------------------------------|---------|---------------------------------|---------|
|                            | Peak MNI coordinates<br>x, y, z | Z value | Peak MNI coordinates<br>x, y, z | Z value      | Peak MNI coordinates<br>x, y, z | Z value | Peak MNI coordinates<br>x, y, z | Z value |
| Left intra-parietal region | -34, -57, 49                    | 3.43    | -19, -68, 65<br>-46, -49, 38    | 3.53<br>3.26 |                                 |         |                                 |         |
| Right ventral striatum     | 8, 11, -4                       | 3.4     |                                 |              | 8, 4, 15                        | 3.32    |                                 |         |
| Left caudate nucleus       | -19, 8, 15                      | 3.33    |                                 |              | -19, 8, 15                      | 3.63    |                                 |         |
| Anterior cingulate cortex  | -8, 27, 23                      | 3.01    |                                 |              | -8, 27, 23                      | 3.07    |                                 |         |
| Left mid. temporal gyrus   |                                 |         |                                 |              |                                 |         | -53, -61, 4                     | 3.39    |

All areas were significant at  $P < 0.005$ , uncorrected for multiple comparisons (random effects model).

**Table S2. Foci of activations at the time of reward delivery versus no reward delivery in young and older subjects and comparison between the two groups**

| Anatomical structure             | Younger subjects                       |         | Older subjects                         |         | Younger > Older                        |         | Older > Younger                        |         |
|----------------------------------|----------------------------------------|---------|----------------------------------------|---------|----------------------------------------|---------|----------------------------------------|---------|
|                                  | Peak MNI coordinates<br><i>x, y, z</i> | Z value | Peak MNI coordinates<br><i>x, y, z</i> | Z value | Peak MNI coordinates<br><i>x, y, z</i> | Z value | Peak MNI coordinates<br><i>x, y, z</i> | Z value |
| Right DLPFC                      | 53, 15, 38                             | 3.26    |                                        |         | 42, 49, 23                             | 2.88    |                                        |         |
| Right DLPFC                      | 46, 46, 19                             | 3.02    | 46, 34, 19                             | 3.08    | 30, 38, 27                             | 2.78    |                                        |         |
| Right iFG                        | 34, 27, -11                            | 4.17    |                                        |         | 36, 8, 11                              | 3.12    |                                        |         |
| Left DLPFC                       | -46, 11, 34                            | 3.7     |                                        |         | -38, 49, 15                            | 2.91    |                                        |         |
| Left iFG                         | -46, 34, 8                             | 3.15    | -53, 42, 11                            | 3.84    | -46, 15, 4                             | 3.23    |                                        |         |
| Sup. medial FG                   | 4, 30, 53                              | 3.57    |                                        |         |                                        |         |                                        |         |
|                                  | 0, -34, 30                             | 3.24    |                                        |         |                                        |         |                                        |         |
| Left intra-parietal cortex       | -34, -65, 49                           | 3.99    | -46, -72, 42                           | 3.14    | -42, -49, 61                           | 3.43    |                                        |         |
| Right intra-parietal cortex      | 30, -68, 49                            | 3.96    | 42, -65, 49                            | 3.46    | 46, -34, 46                            | 4.72    |                                        |         |
| Posterior cingulate cortex       | 0, -34, 30                             | 3.24    | -4, -46, 38                            | 3.28    |                                        |         | -8, -65, 11                            | 3.07    |
| Left post. hippocampus           | -27, -30, -8                           | 3.98    |                                        |         | -30, -38, 0                            | 4.1     |                                        |         |
| Right post. hippocampus          | 19, -30, -4                            | 3.98    |                                        |         |                                        |         |                                        |         |
| Anterior superior frontal cortex |                                        |         | 8, 61, 38                              | 3.65    |                                        |         |                                        |         |
| Anterior medial PFC              |                                        |         |                                        |         |                                        |         | -4, 57, 8                              | 2.86    |
| Inferior parietal cortex         |                                        |         |                                        |         |                                        |         | -49, -72, 38                           | 3.09    |

All areas were significant at  $P < 0.005$ , uncorrected for multiple comparisons (random effects model).
